# Supplementary material for: Bispecific Targeting of PD-1 and PD-L1 Enhances T-cell Activation and Antitumor Immunity
Source: Oxford University Press journal article supplement (doi:10.1158/2326-6066.cir-20-0304), 2020-09-01
Supplement: 23266066cir200304-sup-241450_2_supp_6406930_qdzm9l.docx [file 23266066cir200304-sup-241450_2_supp_6406930_qdzm9l.docx]

**Supplementary Figure S1.**

A.

B.


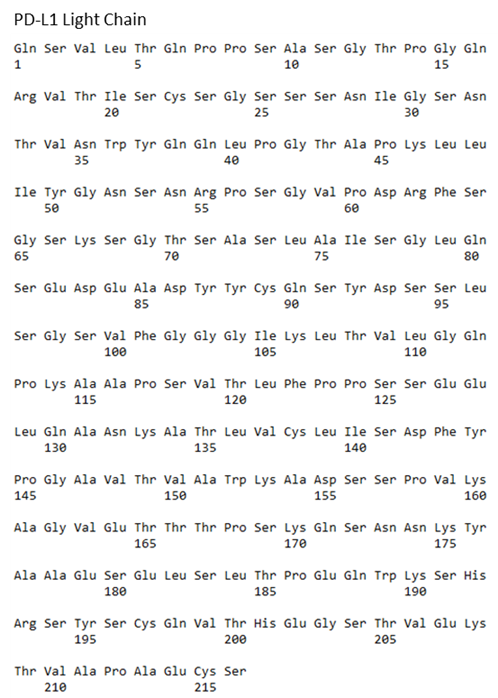


C.


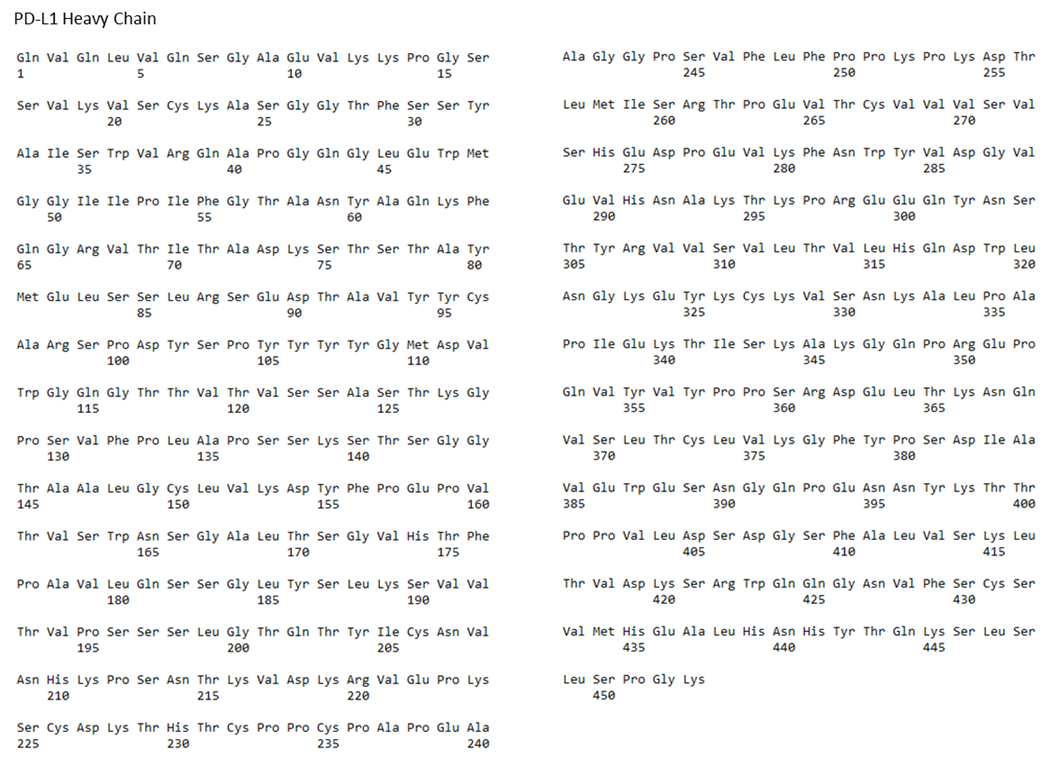


D.


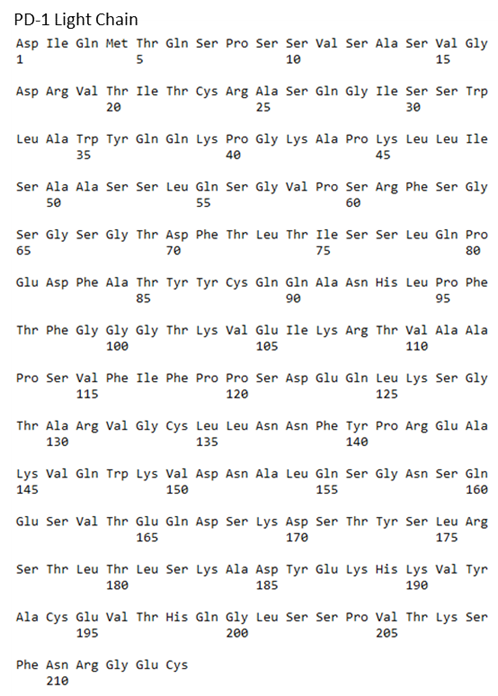


E.


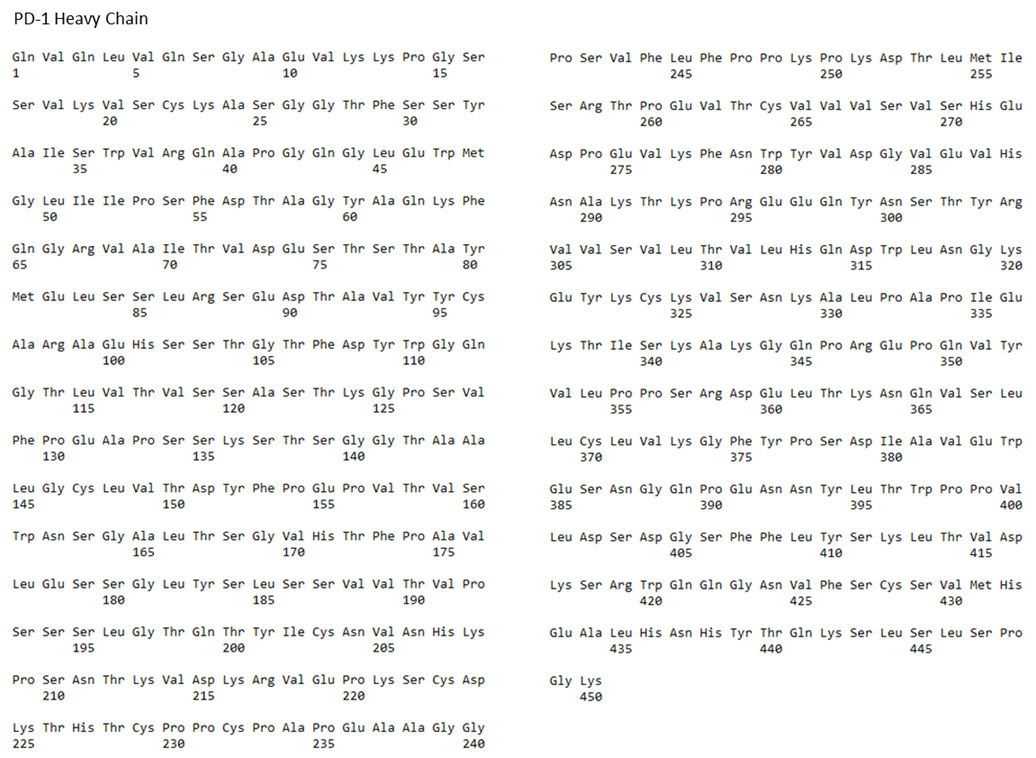


Figure S1. LY3434172 bispecific antibody. (A) Schematic diagram of PD-1/PD-L1 bispecific molecule with a PD-1 targeting arm (LY3300054) and a PD-L1 targeting arm (LY3342903) in a human IgG1 Fc effector null heteromab format. The amino acid sequence of (B) PD-L1 light chain, (C) PD-L1 heavy chain, (D) PD-1 light chain and (E) PD-1 heavy chain.

**Supplementary Figure S2.**

A.

B.

C.


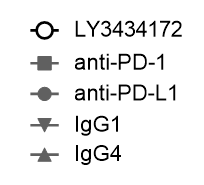


D.

Figure S2. Representative flow cytometry gating strategies and plots. (A) PD-1 or PD-L1 expressing CHO cell gating strategy. (B) Representative plots for data shown in Fig. 1A. (C) HEL tumor cell gating strategy. (D) CFSE stained PD-1 CHO and CTDR stained PD-L1 CHO cell gating strategy and representative plots of double positive events for data shown in Fig. 2B.

**Supplementary Figure S3.**

A.

B.

C.


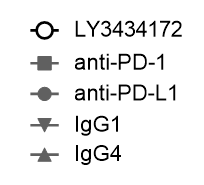


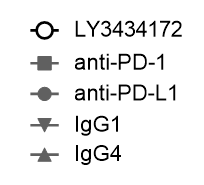


Figure S3. LY3434172 binds PD-1 and PD-L1 and blocks receptor to ligand interactions. (A) Binding ELISA of immobilized recombinant human PD-1 (left) or PD-L1 (right) in 96-well plate incubated with varying concentrations of LY3434172, anti-PD-1, anti-PD-L1 or control IgG. (B) Binding ELISA of LY3434172 to immobilized cynomolgus monkey PD-1 (left) and PD-L1 (right) recombinant proteins in 96-well plate is depicted. Controls tested include anti-PD-1, anti-PD-L1 and IgG. (C) Blocking ELISA of LY3434172 or controls incubated first with human PD-1 or PD-L1 recombinant proteins for 1 hour and then transferred to 96-well plate containing either immobilized human PD-L1 (left), PD-L2 (middle) or CD80 (right). For A to C, each data point represents the mean ±SD of two replicates and one representative of at least two independent experiments is shown.

**Supplementary Figure S4.**

Figure S4. LY3434172 has no detectable Fc mediated effector function. Analysis of ADCC effector function of LY3434172, anti-PD-L1 EC (effector competent version) and IgG1 control. PD-L1 CHO-K1 (left), PD-1 CHO-K1 (middle) and CHO-K1(right) served as target cells and FcγRIIIa positive NFAT luciferase reporter Jurkat used as effector cells. The mean ± SEM is shown.

**Supplementary Figure S5.**

Figure. S5. NFAT Reporter Assay. Increasing concentrations of LY3434172, anti-PD-1, anti-PD-L1 or control IgG was added to PD-L1 and CD80 aAPC/CHO-K1 cells followed by NFAT-Luc2/PD1 Jurkat effector cells. Luminescence signal was measured after 6 hours incubation and relative light units (RLU) versus antibody concentration plotted as shown (mean ± SD). EC50: LY3434172=0.440, anti-PD-1=1.865, anti-PD-L1=0.613. Data are from one representative of at least two experiments.

**Supplementary Figure S6.**

**
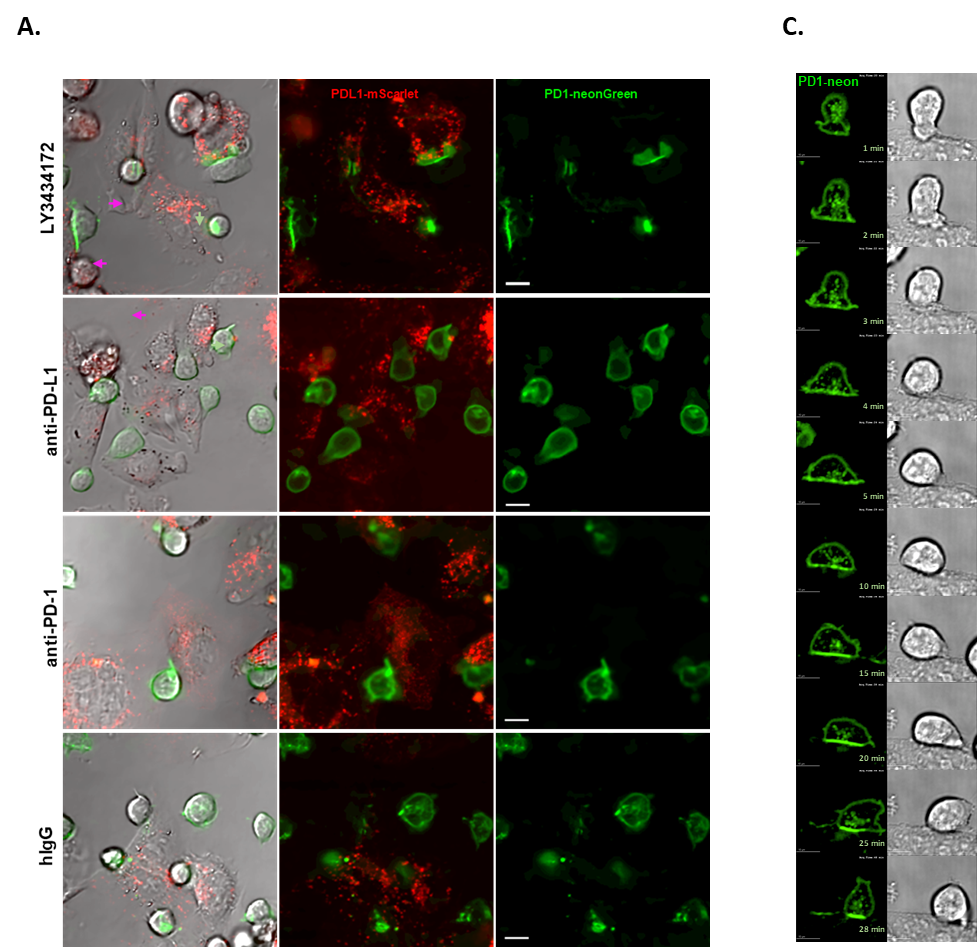
**

**B.**

Figure. S6. LY3434172 bridges PD-1 and PD-L1 expressing cells. (A) Confocal imaging of PD-1 and PD-L1 interaction in response to LY3434172. PD1-neonGreen is re-localized to cell:cell contact sites between the PD1 Jurkat (green) and PDL1 CHO (scarlet) cells in response to LY3434172 but not anti-PD-L1 or anti-PD-1 addition. Representative images are shown. (B) Quantitation of PD-1 localization to the immune synapse (IS) upon addition of LY3434172, anti-PD-L1, anti-PD-1, or control hIgG antibodies. (C) Jurkat cells were analyzed for IS localization of PD1-neonGreen upon incubation with PDL1 CHO cells and LY3434172. Representative images from up to 28 minutes are shown. Scale bars represent 10m.

**Supplementary Figure S7.**

Figure. S7. Mean serum concentration time profile of LY3434172 in female SCID mice following a single 10 mg/kg intravenous bolus administration. The observed serum concentrations as measured by PD-1 and PD-L1 antigen capture and total IgG ELISAs is shown (n=3 samples per timepoint, data are mean±SD).

**Supplementary Figure S8.**

Figure. S8. Body weight graphs from human tumor xenograft mouse models in vivo treated with LY3434172. (A) HCC827 established tumor model. (B) NCI-H292 tumor model. Body weight was measured twice weekly and shown as GEO Mean ± SEM.

**Supplementary Figure S9.**

1. **B. C.**

Figure. S9. Antitumor efficacy of LY3434172 and parent antibodies at high dosage in human tumor xenograft mouse models reconstituted with human immune cells. (A) HCC827 established tumors in NSG mice treated with LY3434172 or parent antibodies anti-PD-1 or anti-PD-L1 as shown; T cell infusion on day 39, n=8 per group. (B) OV79 established tumors in NSG mice treated with antibodies as shown; T cell infusion on day 28, n=7 per group. (C) NCI-H292 tumors co-implanted with PBMCs in NSG mice on day 0 were treated with antibodies as shown, n=8 per group. For A to C: dosing was once weekly as indicated by arrows, tumor volumes are shown as GEO Mean ± SEM.

**Supplementary Table S1**

**Table S1.** Human ADCC and CDCactivity EC50 (nM)

| **Antibody** | **WIL2-S** | **PD-L1 CHO-K1** | **PD-1 CHO-K1** | **CHO-K1** |
| --- | --- | --- | --- | --- |
| **ADCC** | | | | |
| **LY3434172 IgG1-EN** | NA | >1000* | >1000* | >1000* |
| **Anti-PD-L1 IgG1** | NA | 0.015 | >1000* | >1000* |
| **Rituximab** | 0.024 | NA | NA | NA |
| **CDC** | | | | |
| **LY3434172 IgG1-EN** | NA | >1000* | >1000* | >1000* |
| **Anti-PD-L1 IgG1** | NA | >1000* | >1000* | >1000* |
| **Rituximab** | 3.17 | NA | NA | NA |

***** Maximum concentration of Ab used

Abbreviations: EN, effector null; NA, not run

**Supplementary Table S2**

**Table S2.** Human Fcγ receptor and C1q binding EC50 (nM)

| **Antibody** | **FcγRIa** | **FcγRIIa(H)** | **FcγRIIb** | **FcγRIIIa(V)** | **C1q** |
| --- | --- | --- | --- | --- | --- |
| **LY3434172 IgG1-EN** | >1000* | >1000* | >1000* | >1000* | >1000* |
| **Rituximab** | 1.41 | 34.88 | 114.5 | 13.44 | 19.76 |

***** Maximum concentration of Ab used

Abbreviations: EN, effector null

**Supplementary Table S3**

**Table S3**. Mean Serum Pharmacokinetic Parameters of LY3434172 in SCID Mice

| **Dose (mg/kg)** | **Route** | **ELISA Format** | **Cmax (ug/mL)** | **AUC0-inf (hr*ug/mL)** | **T1/2 (hr)** | **CL (mL/hr/kg)** | **Vss (mL/kg)** |
| --- | --- | --- | --- | --- | --- | --- | --- |
| 10 | IV | Total IgG | 255 | 66807 | 293 | 0.15 | 68.1 |
| PD-1 AC | 220 | 81067 | 432 | 0.12 | 79.5 |
| PD L1-AC | 219 | 74055 | 381 | 0.14 | 79.0 |

AC = antigen capture; AUC0-inf = area under the curve from time 0 to infinity; CL= clearance; Cmax = maximum observed concentration; ELISA = enzyme-linked immunosorbent assay; IgG= immunoglobulin G; T1/2 = elimination half life; Vss =volume of distribution at steady state
